# Supplementary material for: High-performance piezoelectric nanogenerators featuring embedded organic nanodroplets for self-powered sensors
Source: Royal Society of Chemistry journal article supplement (doi:10.1039/d2ta02276a), 2022-01-01
Supplement: d2ta02276a1.pdf [file d2ta02276a1.pdf]

**Supporting information:**

**High-Performance Piezoelectric Nanogenerators Featuring  
Embedded Organic Nanodroplets for Self-Powered Sensor**

Hai Li<sup>1</sup>, Sooman Lim<sup>1,\*</sup>

<sup>1</sup> Department of Flexible and Printable Electronics, LANL-JBNU Engineering Institute,  
Jeonbuk National University, Jeonju, 54896, Republic of Korea

\*Corresponding author: Prof. Sooman Lim; E-mail: [smlim@jbnu.ac.kr](mailto:smlim@jbnu.ac.kr)

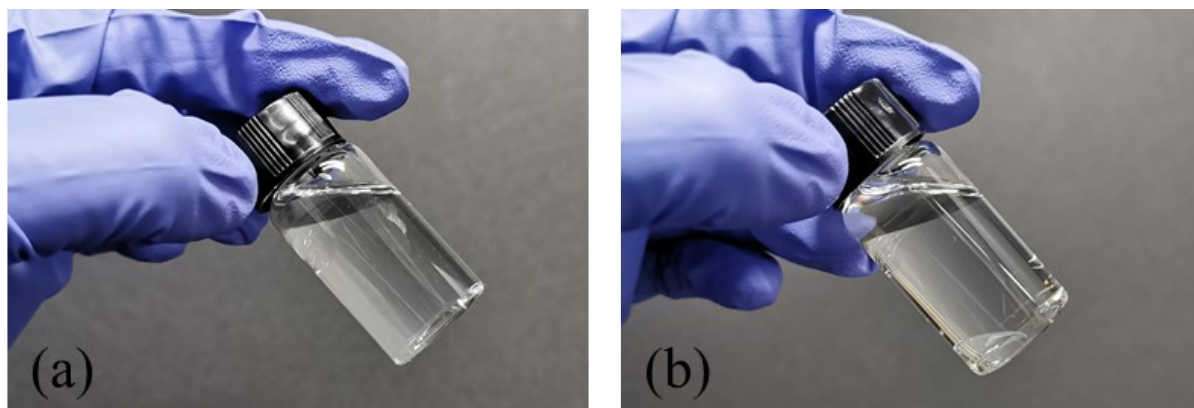

**Figure S1.** Digital photos showing the solubility of the FDTS in DMK solution (a) and DMF solution (b).

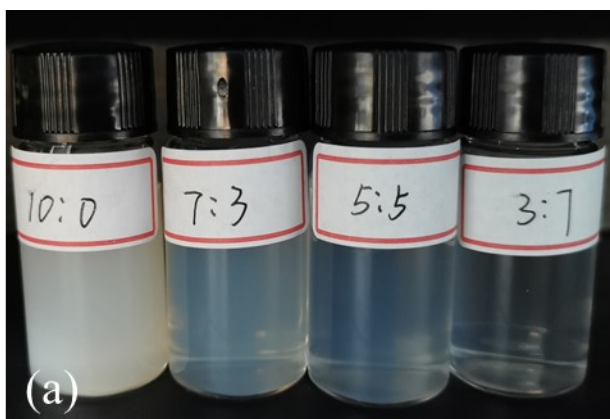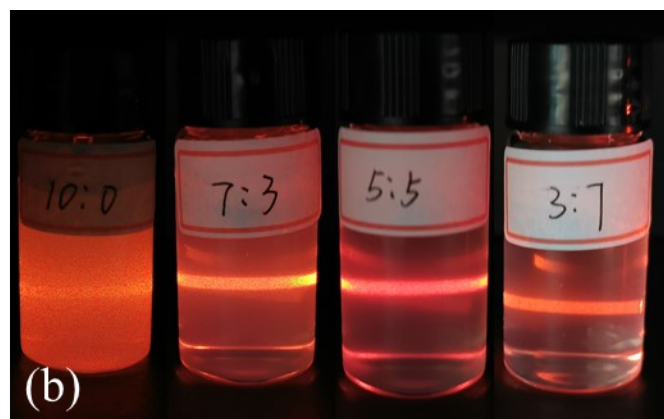

**Figure S2.** The photos of as-prepared emulsions (a) before and (b) after applying the laser beam illustrate the Tyndall effect.

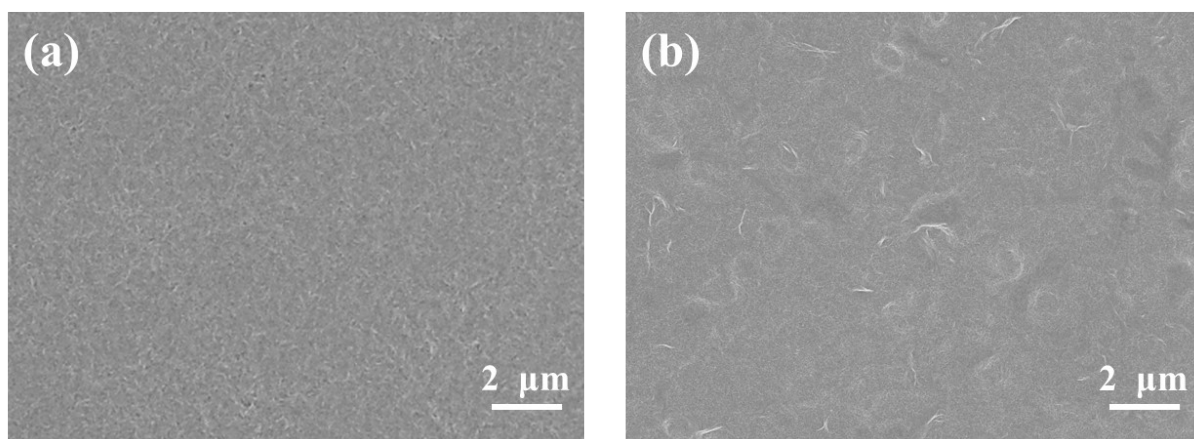

**Figure S3.** SEM images of the surface of the (a) pristine PVDF film and (b) PVDF-10% solid-liquid composite film.

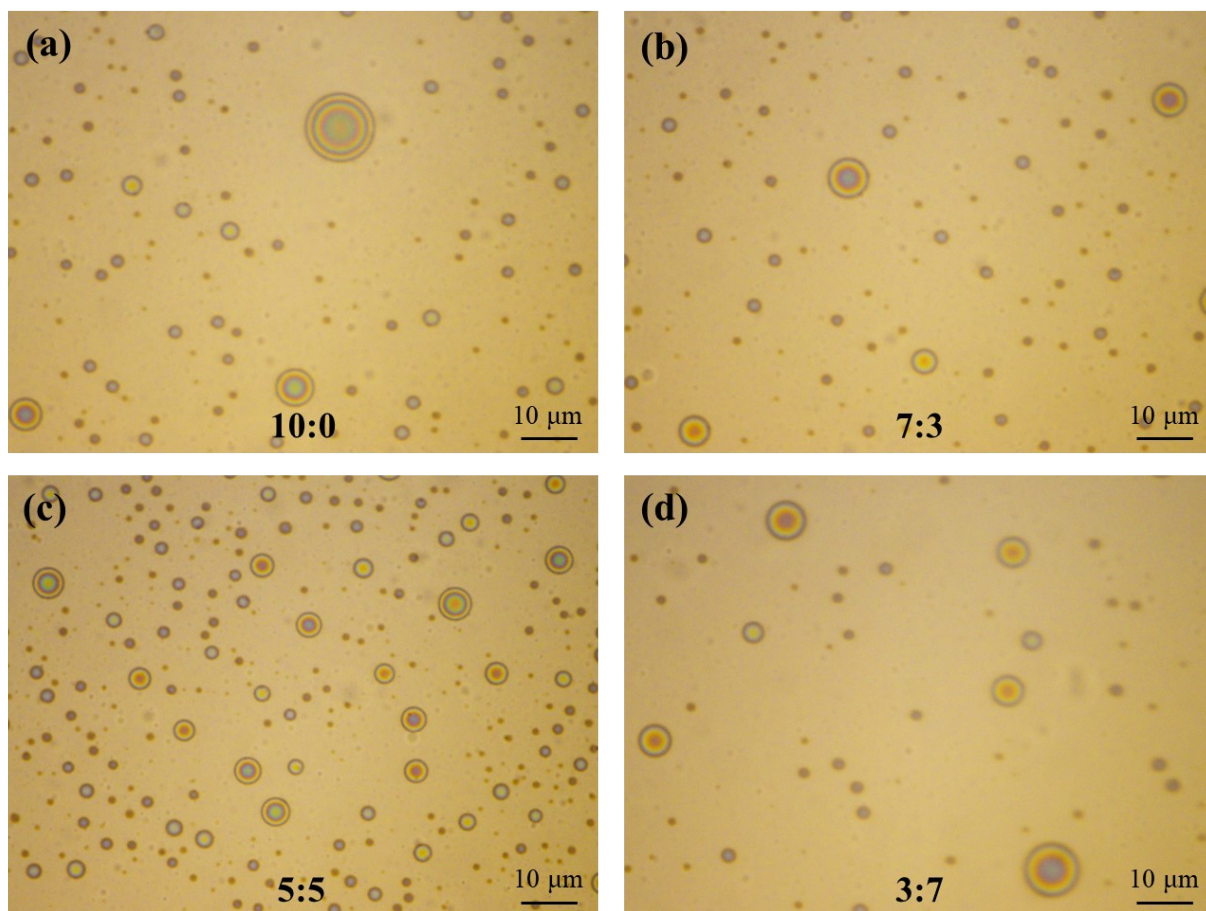

**Figure S4.** Optical micrograph images of the FDTS liquid state in emulsions of the DMF:DMK at (a) 10:0; (b) 7:3; (c) 5:5; (d) 3:7.



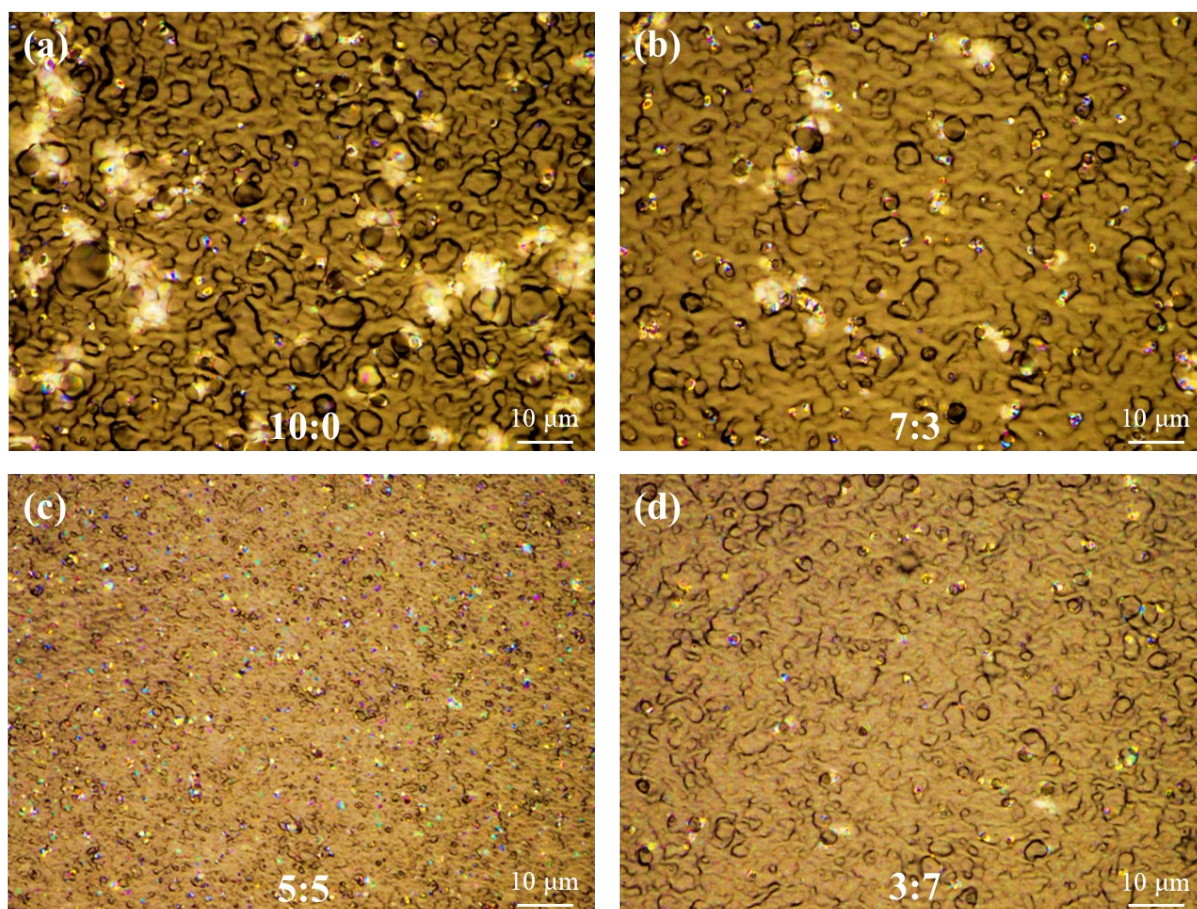

**Figure S5.** Optical micrograph image of the resultant dry film when the volume ratio of the DMF:DMK is (a) 10:0; (b) 7:3; (c) 5:5; (d) 3:7.

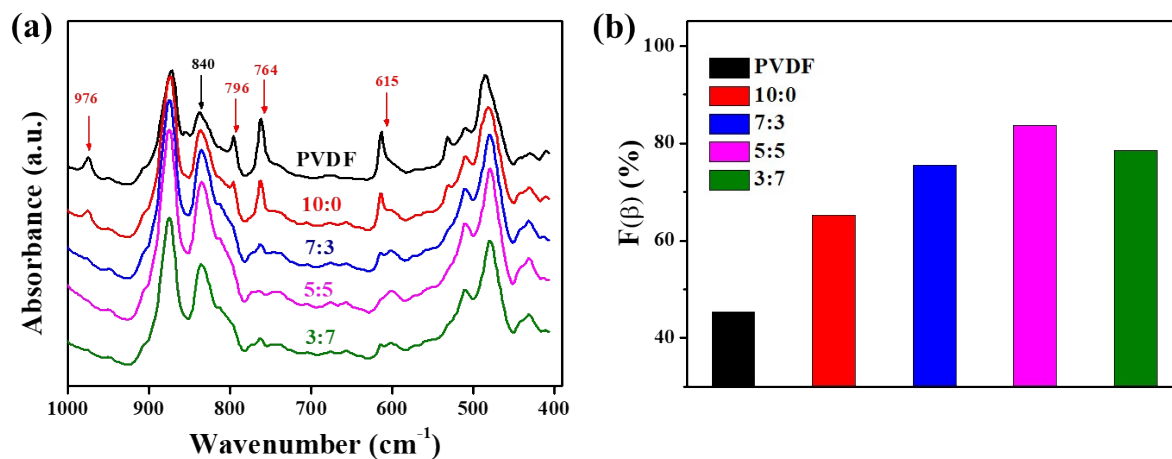

**Figure S6.** (a) FTIR spectra of the bulk PVDF film and solid–liquid nanocomposites prepared under different volume ratios of DMF:DMK. (b) The  $F(\beta)$  value variations in the bulk PVDF film and solid–liquid nanocomposites prepared under different volume ratios of DMF:DMK.

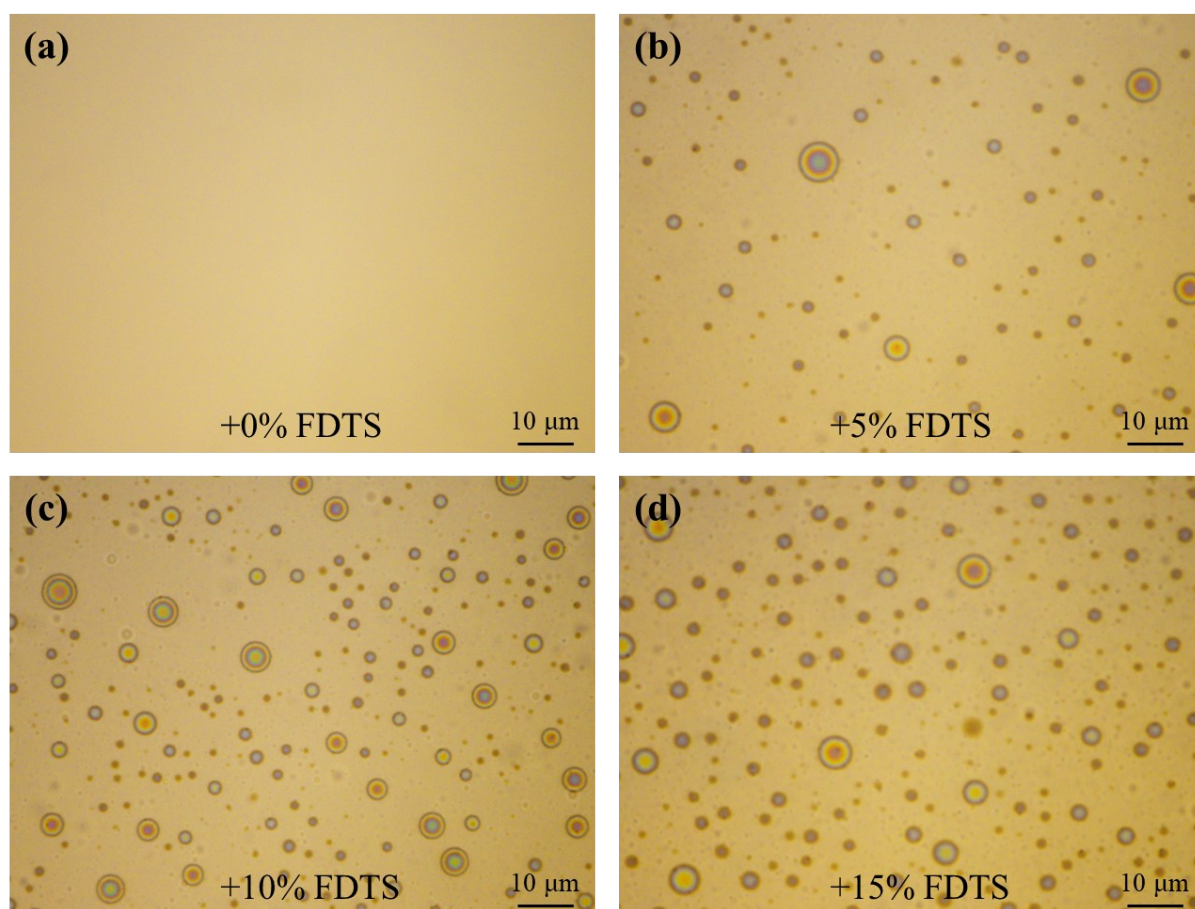

**Figure S7.** Optical micrograph images of the as-prepared emulsions with (a) 0 wt% FDTS, (b) 5 wt% FDTS, (c) 10 wt% FDTS, (d) 15 wt% FDTS.



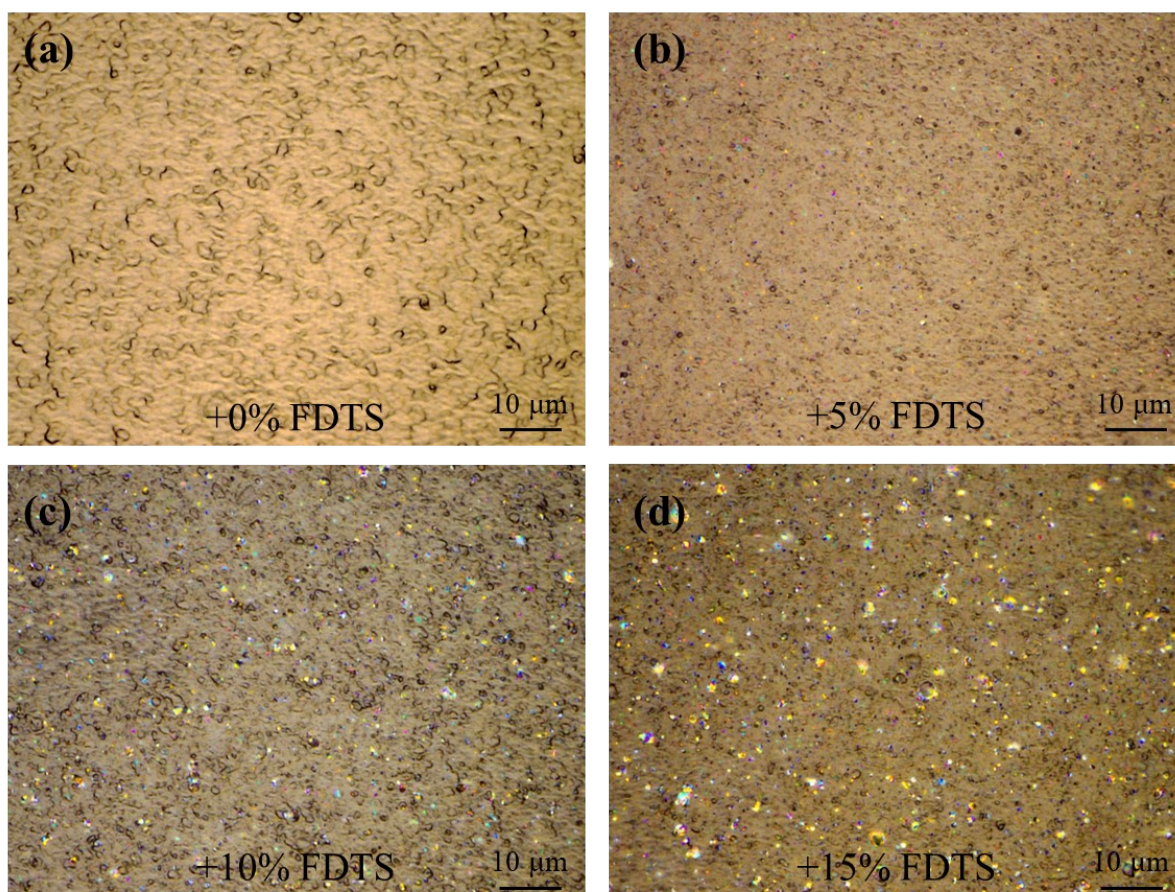

**Figure S8.** Optical micrograph image of the resultant dry film with (a) 0 wt% FDTS, (b) 5 wt% FDTS, (c) 10 wt% FDTS, (d) 15 wt% FDTS.

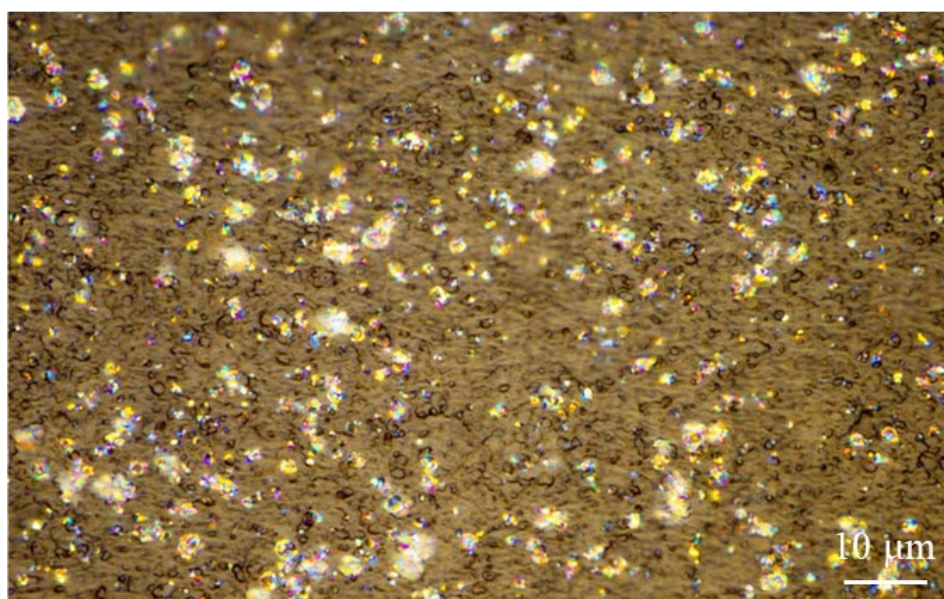

**Figure S9.** Optical micrograph image of the dry film with 20 wt% FDTS.

**Table S1.** Mechanical properties of as-printed films.

| <b>Sample details</b> | <b>Young's modulus<br/>(MPa)</b> | <b>Ultimate tensile<br/>strength (MPa)</b> | <b>Strain-to-failure<br/>(%)</b> |
|-----------------------|----------------------------------|--------------------------------------------|----------------------------------|
| <b>PVDF</b>           | 710.54±83                        | 38.46±7.65                                 | 8.39±3.36                        |
| <b>PVDF-5%</b>        | 598.23±72                        | 30.95±6.18                                 | 15.95±4.53                       |
| <b>PVDF-10%</b>       | 435.89±68                        | 24.06±4.58                                 | 40.39±6.59                       |
| <b>PVDF-15%</b>       | 362.65±76                        | 21.89±5.39                                 | 76.21±9.83                       |

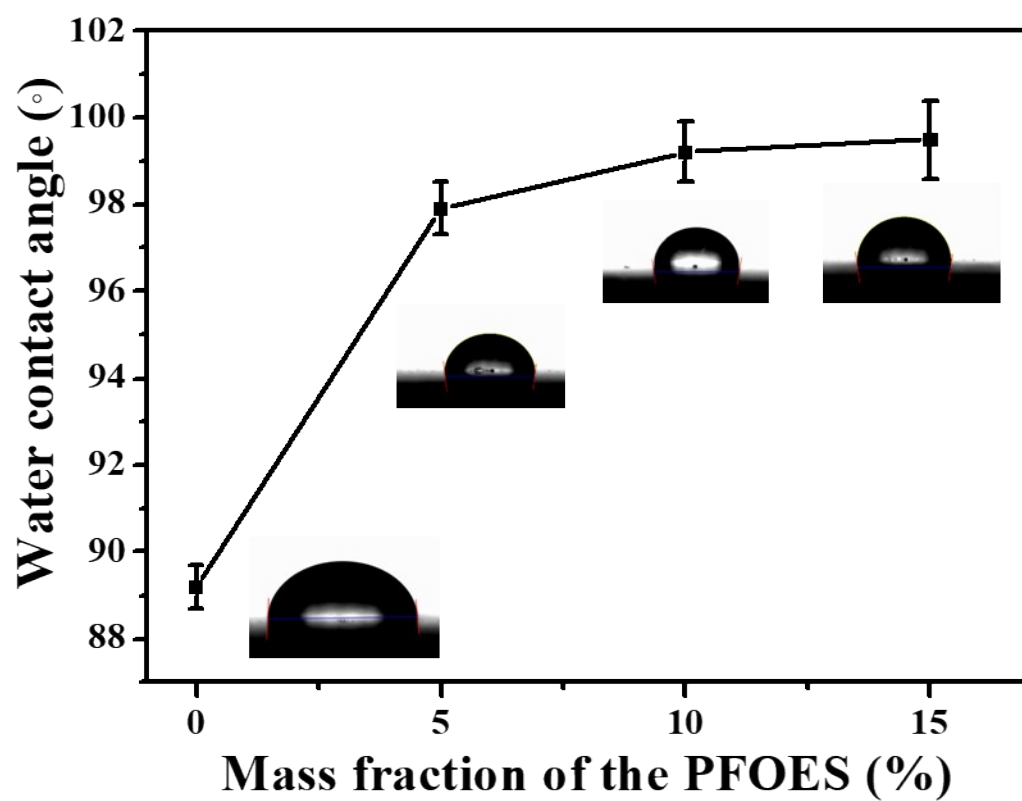

**Figure S10.** Contact angle of as-prepared emulsions with different contents of FDTS dropped on ITO-PET film.

**Table S2.** Calculated surface energies of as-prepared samples using the contact angles measured with two different solvents

| Sample details | Water CA (degrees) | Diiodomethane CA (degrees) | Surface energy (mN m <sup>-1</sup> ) | Dispersive surface energy (mN m <sup>-1</sup> ) | Polar surface energy (mN m <sup>-1</sup> ) |
|----------------|--------------------|----------------------------|--------------------------------------|-------------------------------------------------|--------------------------------------------|
| ITO-PET        | 88.2               | 43.3                       | 38.02                                | 36.42                                           | 1.59                                       |
| PVDF-5%        | 97.9               | 55.7                       | 28.68                                | 25.43                                           | 3.25                                       |
| PVDF-10%       | 99.2               | 56.4                       | 29.72                                | 26.58                                           | 3.06                                       |
| PVDF-15%       | 99.5               | 58.1                       | 31.01                                | 28.07                                           | 2.94                                       |



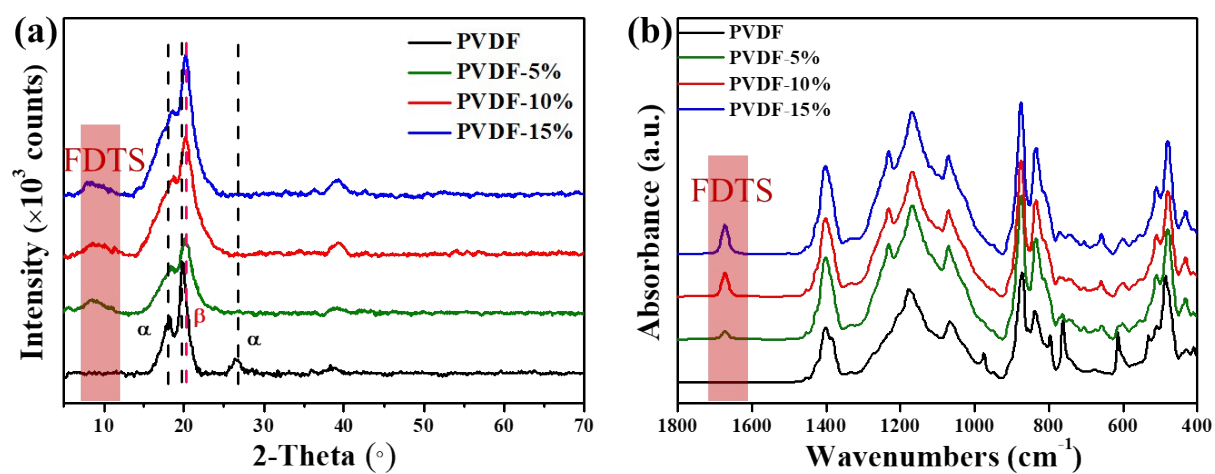

**Figure S11.** XRD and FTIR spectra of the as-printed the bulk PVDF film and solid-liquid nanocomposites.

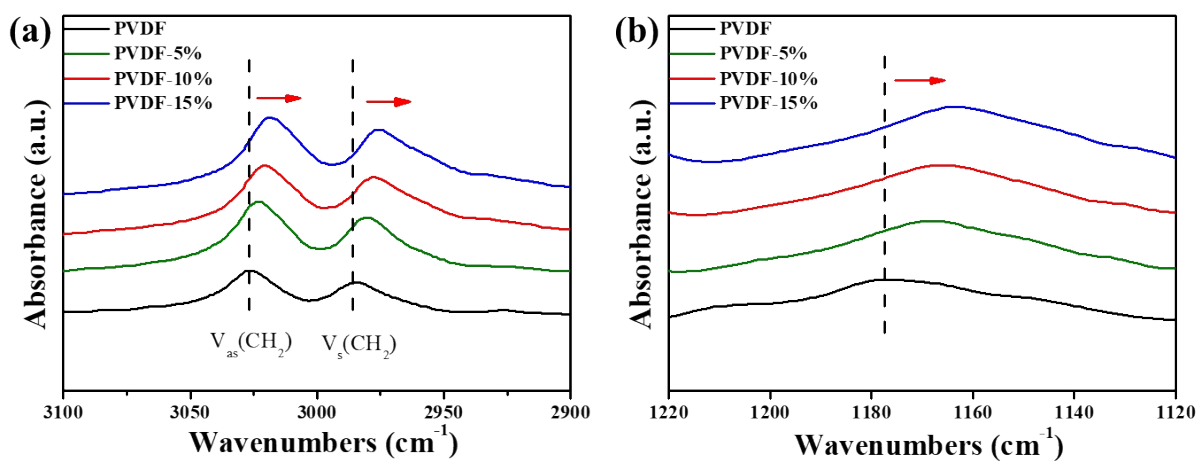

**Figure S12.** FT-IR spectra of the as-printed the bulk PVDF film and solid–liquid nanocomposites with a wavenumber range of (a) 3100 cm<sup>-1</sup> to 2900 cm<sup>-1</sup> and (b) 1220 cm<sup>-1</sup> to 1120 cm<sup>-1</sup>.

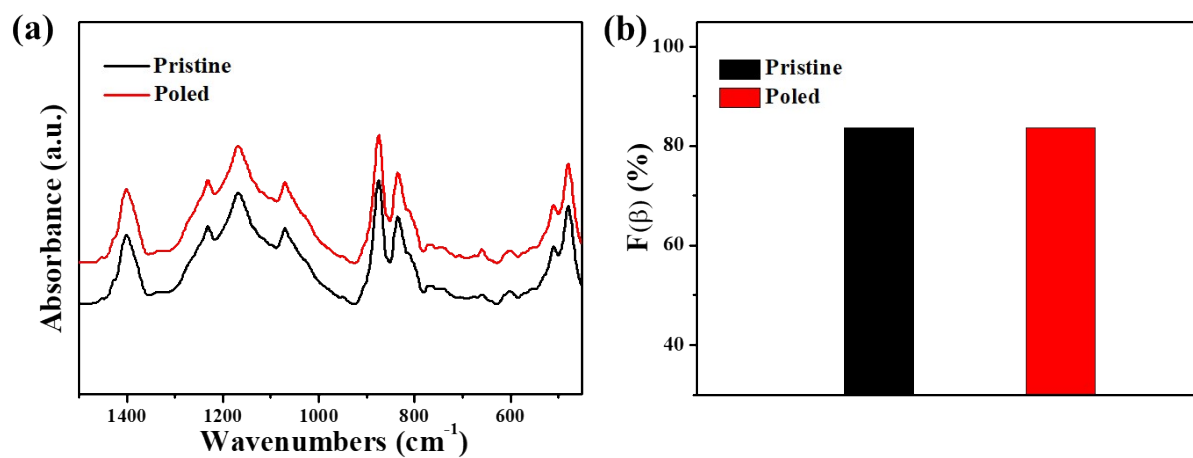

**Figure S13.** (c) FT-IR spectra of the as-printed solid-liquid nanocomposites with and without electric poling. (d) The  $F(\beta)$  values in the printed samples.

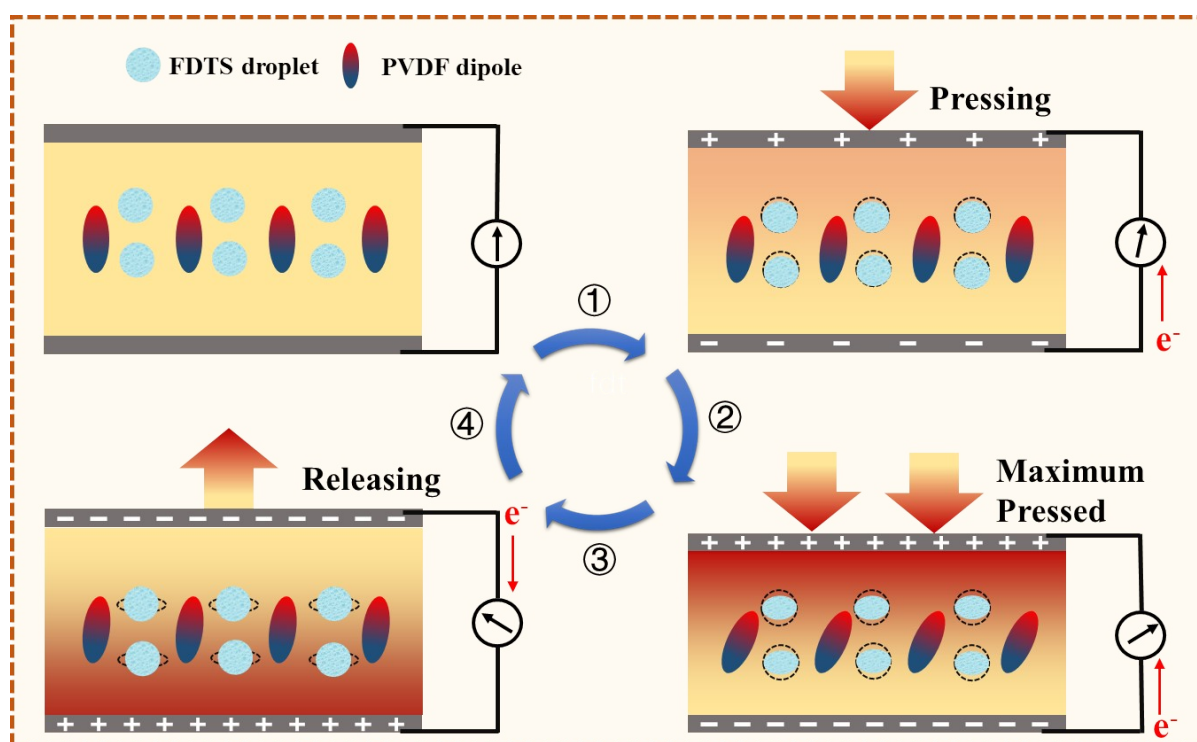

**Figure S14.** Schematic of the electron generation process in the solid–liquid nanocomposite.

**Table S3.** Summary of PVDF-based materials in our study and other reported studies.

| <b>Materials</b>                                        | <b>Form</b>        | <b>Working condition</b> | <b>Voltage</b> | <b>Power density</b>           | <b>Sensitivity</b>        | <b>Ref.</b> |
|---------------------------------------------------------|--------------------|--------------------------|----------------|--------------------------------|---------------------------|-------------|
| MXene/ PVDF                                             | Porous film        | 0.1 MPa                  | 1.5 V          | 0.13 $\mu\text{W}/\text{cm}^2$ | 11.9 nA/kPa               | [1]         |
| PVDF                                                    | Porous film        | 2G acceleration          | 40 V           | 012 $\mu\text{W}/\text{cm}^2$  | None                      | [2]         |
| CH <sub>3</sub> NH <sub>3</sub> PbI <sub>3</sub> / PVDF | Porous film        | finger imparting         | 1.5 V          | 2.5 $\mu\text{W}/\text{cm}^2$  | None                      | [3]         |
| Ag nanowire/ PVDF                                       | Porous film        | 10 N                     | 23 V           | 7.1 $\mu\text{W}/\text{cm}^2$  | None                      | [4]         |
| FAPbBr <sub>2</sub> I/ PVDF                             | Porous film        | 2G acceleration          | 42 V           | 10 $\mu\text{W}/\text{cm}^2$   | None                      | [5]         |
| P(VDF-HFP)                                              | Porous film        | 0.36 MPa                 | 9 V            | 11 $\mu\text{W}/\text{cm}^2$   | 1 $\mu\text{V}/\text{Pa}$ | [6]         |
| PVDF-TrFE                                               | Porous film        | 0.2 MPa                  | 21 V           | 28.5 $\mu\text{W}/\text{cm}^2$ | None                      | [7]         |
| BNNT/PVDF-TrFE                                          | Micropillar arrays | 0.4 MPa                  | 22 V           | 11.3 $\mu\text{W}/\text{cm}^2$ | 55 V/MPa                  | [8]         |
| BTO/PVDF-TrFE                                           | Micropillar arrays | 0.5 MPa                  | 13.2 V         | 12.7 $\mu\text{W}/\text{cm}^2$ | 257.9 mV/N                | [9]         |
| FDTS/PVDF                                               | Solid-liquid film  | 0.5 MPa                  | 62 V           | 32.8 $\mu\text{W}/\text{cm}^2$ | 0.134V/kPa                | This work   |



## References

- [1]. Kim J, Jang M, Jeong G, et al. MXene-enhanced  $\beta$ -phase crystallization in ferroelectric porous composites for highly-sensitive dynamic force sensors[J]. Nano Energy, 2021, 89: 106409.
- [2]. Rana M M, Khan A A, Huang G, et al. Porosity Modulated High-Performance Piezoelectric Nanogenerator Based on Organic/Inorganic Nanomaterials for Self-Powered Structural Health Monitoring[J]. ACS Applied Materials & Interfaces, 2020, 12(42): 47503-47512.
- [3]. Sultana A, Sadhukhan P, Alam M M, et al. Organo-lead halide perovskite induced electroactive  $\beta$ -phase in porous PVDF films: an excellent material for photoactive piezoelectric energy harvester and photodetector[J]. ACS applied materials & interfaces, 2018, 10(4): 4121-4130.
- [4]. Zhou Z, Du X, Luo J, et al. Coupling of interface effects and porous microstructures in translucent piezoelectric composites for enhanced energy harvesting and sensing[J]. Nano Energy, 2021, 84: 105895.
- [5]. Khan A A, Rana M M, Huang G, et al. Maximizing piezoelectricity by self-assembled highly porous perovskite–polymer composite films to enable the internet of things[J]. Journal of Materials Chemistry A, 2020, 8(27): 13619-13629.
- [6]. Mahanty B, Ghosh S K, Garain S, et al. An effective flexible wireless energy harvester/sensor based on porous electret piezoelectric polymer[J]. Materials Chemistry and Physics, 2017, 186: 327-332.
- [7]. Abolhasani M M, Naebe M, Hassanpour Amiri M, et al. Hierarchically structured porous piezoelectric polymer nanofibers for energy harvesting[J]. Advanced Science, 2020, 7(13): 2000517.
- [8]. Ye S, Cheng C, Chen X, et al. High-performance piezoelectric nanogenerator based on microstructured P (VDF-TrFE)/BNNTs composite for energy harvesting and radiation protection in space[J]. Nano Energy, 2019, 60: 701-714.
- [9]. Chen X, Li X, Shao J, et al. High-performance piezoelectric nanogenerators with imprinted P (VDF-TrFE)/BaTiO<sub>3</sub> nanocomposite micropillars for self-powered flexible sensors[J]. Small, 2017, 13(23): 1604245.
